# Supplementary material for: A Genetically Hard-Wired Metabolic Transcriptome in Plasmodium falciparum Fails to Mount Protective Responses to Lethal Antifolates
Source: PLoS Pathog. 2008 Nov 21;4(11):e1000214. doi: 10.1371/journal.ppat.1000214 (PMC2581438; doi:10.1371/journal.ppat.1000214)
Supplement: Table S6 — (0.05 MB XLS) [file ppat.1000214.s010.xls]

## Sheet: Sheet1
12-AFAG				Mean Log2 (treatment/ref pool)
Name	OligoID	PlasmoDB ID	Annotation	SD3	SD6	SD9	SD15	SD18	SD21	SD24	SS3	SS6	SS9	SS15	SS18	SS21	SS24	RD3	RD6	RD9	RD15	RD18	RD21	RD24	RS3	RS6	RS9	RS15	RS18	RS21	RS24
AFAG1	n149_11	PF14_0486	elongation factor 2	-0.1161	-0.1621	-0.4553	-0.4334	-0.7281	-0.5492	-0.7375	0.5525	-0.2475	-0.6342	-0.6941	-1.09	-0.9778	-0.822	-0.01592	-0.3496	-0.4405	-0.8188	-1.311	-0.9074	-1.062	-0.1952	-0.2943	-0.8263	0.05917	-0.1056	-0.4582	-0.7385
AFAG2	f40797_1	PF11_0507	antigen 332, putative	0.5091	-0.266	-0.42	-1.551	-2.006	-1.715	-1.695	0.4931	-0.746	-1.004	-1.519	-1.527	-1.661	-1.653	-0.1919	-0.5268	-1.344	-1.962	-1.448	-1.57	-1.465	-0.302	-1.327	-1.602	0.395	-0.1436	-0.4672	-0.2153
AFAG3	d4619_1		N/A	-0.2638	-0.543	-0.5691	-0.7817	-1.184	-1.103	-1.594	-0.08377	-0.5485	-0.5479	-1.121	-1.399	-1.817	-1.8	0.339	-0.1186	-0.5736	-0.6937	-1.264	-1.321	-1.498	-0.1019	-0.4148	-0.9523	0.2107	-0.2529	-0.3129	-0.07285
AFAG4	opfj12781	PF10_0159	glycophorin-binding protein 130 precursor	-0.3455	-0.2048	-0.3566	-0.8098	-1.278	-1.375	-2.059	0.4618	-0.4874	-0.6216	-1.462	-2.003	-2.752	-2.972	-0.132	-0.1681	-0.9906	-1.202	-2.183	-1.73	-2.177	-0.309	-0.4492	-1.334	0.4632	0.005463	-0.3539	-0.3666
AFAG5	i9688_1		N/A	0.1952	-0.4178	-0.006654	-1.424	-1.918	-1.795	-2.489	0.4049	-0.6384	-0.8358	-2.273	-2.416	-3.473	-3.971	-0.1791	-0.6327	-1.99	-2.268	-2.575	-2.71	-3.188	-0.08464	-1.301	-1.786	0.2591	-0.3488	-0.1927	0.01312
AFAG6	j62_1	PF10_0281	hypothetical protein, MTRAP	0.1127	0.174	0.3264	0.4023	0.4819	0.4588	0.4445	0.1292	0.4361	0.696	1.331	1.629	1.571	1.573	-0.1402	0.06842	0.2577	0.663	1.359	1.564	1.452	-0.1917	-0.06442	0.4987	0.1319	0.4265	0.4607	0.4805
AFAG7	n133_26		N/A	0.2256	0.3161	0.4486	0.297	0.7861	0.6598	0.943	-0.02026	0.3548	1.113	1.292	1.821	1.795	2.188	-0.2447	-0.06835	0.4988	1.031	1.222	1.166	1.414	-0.1875	0.1894	0.6356	-0.02769	-0.1173	0.5166	0.6089
AFAG8	ks510_8	PF11_0381	subtilisin-like protease 2, Pfsub2	-0.1289	-0.1761	-0.1228	-0.06288	0.07698	0.2435	0.3375	0.09279	-0.2083	0.2203	0.4751	0.5764	0.8307	1.422	-0.3433	-0.3627	-0.1836	0.2511	0.7786	0.875	0.976	-0.2947	-0.2965	-0.1627	0.08466	-0.0833	-0.212	-0.09844
AFAG9	i3555_1	PFI1005w	ADP-ribosylation factor-like protein, putative	-0.1779	-0.4545	-0.3707	-0.2861	-0.2304	-0.1077	0.006584	-0.07605	-0.2984	-0.1947	0.8094	0.5827	1.359	1.027	-0.1113	-0.36	-0.3557	0.4861	1.027	0.9758	1.165	-0.01716	-0.6134	-0.3489	0.05955	-0.4853	-0.5075	-0.1449
AFAG10	f57713_2	MAL7P1.172	hypothetical protein	-0.1098	-0.1545	-0.08411	0.1569	0.2179	0.3674	0.3874	-0.07847	-0.3304	-0.3893	0.04593	0.1907	0.5798	1.374	-0.1251	-0.2957	-0.2476	0.02751	0.2011	0.2914	0.4082	0.2276	-0.2383	-0.1436	-0.09394	-0.3138	-0.05204	0.04022
AFAG11	n159_1	PF14_0046	hypothetical protein	-0.2198	-0.01759	-0.2397	0.294	0.2951	0.5445	0.3264	-0.07153	-0.2795	-0.2802	0.2115	0.2331	0.2605	0.4597	-0.2388	-0.2284	-0.2756	0.0976	0.1916	0.338	0.3006	0.154	-0.09008	-0.1934	0.06038	-0.4899	-0.45	-0.1621
AFAG12	opfblob0036		N/A	-0.2485	-0.2454	-0.2334	0.1829	0.1506	0.2523	0.2603	-0.09712	-0.1823	-0.2092	0.2379	0.2317	0.5224	0.8655	0.3705	0.2611	0.424	0.531	0.5344	0.5894	0.9431	0.0419	0.1626	0.4047	-0.07675	-0.4777	-0.2577	-0.04639
